# Supplementary material for: The 21Ne/20Ne ratio of atmospheric neon
Source: Royal Society of Chemistry journal article supplement (doi:10.1039/d0ja00031k), 2020-01-01
Supplement: d0ja00031k1.xlsx [file d0ja00031k1.xlsx]

## Sheet: sample 1
		All uncertainties (u) herein are 1 standard uncertainty
		includes			21Ne includes baseline decay correction						no	with	uncertainty			uncertainty											1e6*	1e6*
		blank									NeH	NeH	k=1			k=1											D21	D21
		and HF			error does not include allowance for error						correction	correction																u(k=1)
		correction			in baseline decay correction
		20Ne Volts	u(k=1)		21Ne Volts	u(k=1)		22Ne Volts	u(k=1)		21Ne/20Ne	21Ne/20Ne	for either 21/20		22Ne/20Ne			side 20	side 21	side 22
		3.45445	0.00038		0.0101618	1.8e-06		0.35343	5e-05		0.00294246	0.00294164	6.1e-07		0.102311	1.8e-05		0.779973	0.553947	0.414886		'' run on 27 September 2019 at 20:26					2937	0.666496
		1.64836	0.00013		0.00484407	1.6e-06		0.168368	2.1e-05		0.00294033	0.00293873	9.7e-07		0.102143	1.5e-05		0.781604	0.442335	0.422396		'' run on 27 September 2019 at 21:49					2936.59	0.99548
		0.576561	3.7e-05		0.00169174	1.5e-06		0.0587753	9e-06		0.00293856	0.00293419	2.5e-06		0.101941	1.7e-05		0.690312	0.434399	0.609464		'' run on 27 September 2019 at 23:13					2935.06	2.51283
		0.575986	5.8e-05		0.00169265	1.5e-06		0.0586832	1.1e-05		0.00294308	0.0029387	2.5e-06		0.101883	2.2e-05		0.516824	0.450513	0.595568		'' run on 28 September 2019 at 00:37					2940.44	2.52145
		1.64415	0.00023		0.00483263	1.5e-06		0.167844	2.7e-05		0.00294088	0.00293928	1e-06		0.102085	2.2e-05		0.699688	0.511916	0.320716		'' run on 28 September 2019 at 01:58					2938.01	1.05249
		3.44254	0.00042		0.0101238	1.8e-06		0.352305	5.5e-05		0.00294162	0.0029408	6.4e-07		0.102339	2e-05		0.765208	0.642722	0.683136		'' run on 28 September 2019 at 03:18					2935.75	0.70614
		3.44489	0.00031		0.0101318	1.8e-06		0.352662	4.9e-05		0.00294194	0.00294112	5.7e-07		0.102373	1.7e-05		0.522783	0.465822	0.522845		'' run on 28 September 2019 at 07:24					2935.56	0.62388
		1.64409	0.00011		0.00483323	1.5e-06		0.167911	2.4e-05		0.00294137	0.00293977	9.4e-07		0.10213	1.6e-05		0.672443	0.417777	0.4551		'' run on 28 September 2019 at 08:46					2937.82	0.969836
		0.574938	3.1e-05		0.00168884	1.5e-06		0.0585883	8.8e-06		0.00294182	0.00293744	2.6e-06		0.101904	1.6e-05		0.476505	0.532485	0.404161		'' run on 28 September 2019 at 10:11					2938.88	2.61093
		0.57446	6.4e-05		0.00168707	1.4e-06		0.0585309	1.1e-05		0.00294119	0.0029368	2.5e-06		0.101889	2.2e-05		0.679116	0.443433	0.630531		'' run on 28 September 2019 at 11:36					2938.46	2.52145
		1.63999	0.00022		0.00481813	1.6e-06		0.167465	2.4e-05		0.00293951	0.00293791	1e-06		0.102114	2e-05		0.751653	0.618241	0.639124		'' run on 28 September 2019 at 12:57					2936.21	1.04357
		3.43933	0.0003		0.0101183	1.7e-06		0.352003	5.3e-05		0.00294276	0.00294194	5.6e-07		0.102346	1.8e-05		0.623666	0.443634	0.499053		'' run on 28 September 2019 at 14:18					2936.77	0.621061
		3.43724	0.00043		0.0101077	1.8e-06		0.351792	5.2e-05		0.00294146	0.00294064	6.4e-07		0.102347	2e-05		0.732175	0.622242	0.551513		'' run on 28 September 2019 at 18:20					2935.46	0.70614
		1.64177	0.00012		0.00482437	1.6e-06		0.167708	2.1e-05		0.00294013	0.00293852	1e-06		0.102151	1.5e-05		0.639272	0.503309	0.460461		'' run on 28 September 2019 at 19:41					2936.27	1.02473
		0.574759	3.3e-05		0.00168773	1.4e-06		0.0585644	1e-05		0.0029408	0.00293642	2.5e-06		0.101894	1.8e-05		0.742052	0.567648	0.545991		'' run on 28 September 2019 at 21:06					2938	2.51438
		0.573245	6.2e-05		0.00168074	1.5e-06		0.0583973	1e-05		0.00293638	0.00293198	2.6e-06		0.101871	2e-05		0.665078	0.52226	0.374244		'' run on 28 September 2019 at 22:29					2933.89	2.61707
		1.63699	0.00023		0.00480883	1.5e-06		0.167153	2.9e-05		0.00293921	0.0029376	1e-06		0.10211	2.3e-05		0.581707	0.436641	0.432764		'' run on 28 September 2019 at 23:51					2935.96	1.05724
		3.43193	0.00037		0.0100925	1.7e-06		0.351275	5.1e-05		0.00294158	0.00294076	5.8e-07		0.102355	1.9e-05		0.734469	0.460076	0.639134		'' run on 29 September 2019 at 01:14					2935.46	0.645564
		3.42908	0.00032		0.0100873	1.8e-06		0.351049	4.7e-05		0.00294251	0.00294169	5.9e-07		0.102374	1.7e-05		0.631633	0.657363	0.713101		'' run on 29 September 2019 at 05:17					2936.1	0.642205
		1.63782	0.0001		0.00481365	1.5e-06		0.167312	2.1e-05		0.00294067	0.00293906	9.6e-07		0.102155	1.4e-05		0.605116	0.497602	0.610086		'' run on 29 September 2019 at 06:37					2936.74	0.982459
		0.573347	4e-05		0.00168177	1.5e-06		0.0584282	9.2e-06		0.00293765	0.00293326	2.5e-06		0.101907	1.7e-05		0.64048	0.458228	0.380551		'' run on 29 September 2019 at 08:01					2934.64	2.51283
		0.571428	5.3e-05		0.00167586	1.5e-06		0.058238	1.1e-05		0.00293717	0.00293275	2.6e-06		0.101917	2.1e-05		0.667542	0.406551	0.465712		'' run on 29 September 2019 at 09:26					2934	2.61881
		1.63391	0.00021		0.00479731	1.6e-06		0.166832	2.5e-05		0.0029377	0.00293609	1e-06		0.102106	2e-05		0.70037	0.543083	0.676902		'' run on 29 September 2019 at 10:46					2934.51	1.04357
		3.42796	0.00037		0.0100825	1.9e-06		0.350867	5.2e-05		0.00294207	0.00294124	6.3e-07		0.102355	1.9e-05		0.724294	0.535528	0.598453		'' run on 29 September 2019 at 12:07					2935.95	0.690835
		3.42823	0.00033		0.0100891	1.7e-06		0.350988	5e-05		0.00294377	0.00294294	5.8e-07		0.102382	1.8e-05		0.469291	0.380876	0.357792		'' run on 29 September 2019 at 16:09					2937.24	0.639153
		1.63445	0.00011		0.00480279	1.6e-06		0.16695	2.2e-05		0.00294009	0.00293848	9.7e-07		0.102144	1.5e-05		0.769105	0.492987	0.465594		'' run on 29 September 2019 at 17:32					2936.33	0.99548
		0.572245	3.2e-05		0.00167977	1.4e-06		0.0583284	9.2e-06		0.00293981	0.00293541	2.5e-06		0.101929	1.7e-05		0.429027	0.563232	0.528651		'' run on 29 September 2019 at 18:55					2936.46	2.51283
		0.571141	6.1e-05		0.00167624	1.5e-06		0.0581996	1.1e-05		0.0029393	0.00293489	2.6e-06		0.1019	2.2e-05		0.49648	0.438957	0.349392		'' run on 29 September 2019 at 20:20					2936.37	2.62064
		1.62958	0.00019		0.00478737	1.6e-06		0.166409	2.6e-05		0.00293941	0.00293779	1e-06		0.102117	2e-05		0.668545	0.332846	0.298926		'' run on 29 September 2019 at 21:42					2936.04	1.04357
		3.42026	0.00037		0.01006	1.8e-06		0.350086	4.5e-05		0.00294213	0.00294131	6.2e-07		0.102357	1.7e-05		0.648648	0.477058	0.472679		'' run on 29 September 2019 at 23:03					2935.99	0.669871
		3.41639	0.00029		0.0100447	1.8e-06		0.34968	4.6e-05		0.00294098	0.00294015	5.8e-07		0.102354	1.6e-05		0.636237	0.42605	0.473638		'' run on 30 September 2019 at 03:05					2934.88	0.627201
		1.63021	0.00011		0.00479011	1.6e-06		0.166527	2.1e-05		0.00293996	0.00293834	9.9e-07		0.10215	1.5e-05		0.783369	0.415886	0.620949		'' run on 30 September 2019 at 04:26					2936.1	1.01498
		0.570868	3.7e-05		0.00167456	1.5e-06		0.0581766	8.5e-06		0.00293778	0.00293337	2.5e-06		0.101909	1.6e-05		0.751395	0.534665	0.641819		'' run on 30 September 2019 at 05:51					2934.72	2.51137
		0.569365	6.1e-05		0.00167033	1.5e-06		0.0580026	1.1e-05		0.0029381	0.00293367	2.6e-06		0.101873	2.3e-05		0.750131	0.437695	0.477177		'' run on 30 September 2019 at 07:16					2935.57	2.62255
		1.62688	0.00024		0.0047794	1.6e-06		0.166144	2.7e-05		0.00293939	0.00293777	1.1e-06		0.102125	2.2e-05		0.786133	0.701037	0.565505		'' run on 30 September 2019 at 08:39					2935.92	1.14792
		3.41449	0.00047		0.0100426	1.7e-06		0.349484	4.4e-05		0.002942	0.00294117	6.4e-07		0.102353	1.9e-05		0.664564	0.685422	0.626367		'' run on 30 September 2019 at 10:00					2935.9	0.699966
		3.41103	0.00034		0.0100319	1.8e-06		0.349141	4.8e-05		0.00294184	0.00294101	6e-07		0.102356	1.7e-05		0.645113	0.343758	0.367982		'' run on 30 September 2019 at 16:11					2935.7	0.651404
		1.62677	0.00013		0.00478053	1.6e-06		0.166181	2.3e-05		0.00294028	0.00293866	9.9e-07		0.102154	1.6e-05		0.555437	0.459119	0.545219		'' run on 30 September 2019 at 17:33					2936.36	1.01837
		3.40187	0.00039		0.0100041	1.7e-06		0.348197	4.7e-05		0.00294161	0.00294078	6.1e-07		0.102355	1.8e-05		0.933769	0.581575	0.626074		'' run on 30 September 2019 at 20:40					2935.49	0.666496
		1.62572	0.00012		0.00477555	1.6e-06		0.166061	2.2e-05		0.00293911	0.00293749	9.9e-07		0.102146	1.6e-05		0.854207	0.49133	0.52891		'' run on 30 September 2019 at 22:01					2935.32	1.01837
		0.568239	3.5e-05		0.00166726	1.5e-06		0.0579261	9.9e-06		0.00293853	0.00293409	2.5e-06		0.10194	1.8e-05		0.724292	0.407842	0.427818		'' run on 30 September 2019 at 23:24					2934.99	2.51438
		0.567825	5.9e-05		0.00166536	1.5e-06		0.0578419	1.1e-05		0.00293732	0.00293288	2.6e-06		0.101866	2.2e-05		0.666108	0.370956	0.213948		'' run on 01 October 2019 at 00:48					2934.88	2.62064
		1.62019	0.0002		0.00475704	1.5e-06		0.165437	2.7e-05		0.00293772	0.00293609	1e-06		0.102109	2.1e-05		0.682773	0.560421	0.631909		'' run on 01 October 2019 at 02:09					2934.46	1.04793
		3.4016	0.00033		0.0100031	1.7e-06		0.348254	4.2e-05		0.00294155	0.00294072	5.8e-07		0.102379	1.6e-05		0.46519	0.364651	0.485739		'' run on 01 October 2019 at 03:30					2935.06	0.627201
		3.40034	0.00028		0.00999623	1.7e-06		0.347996	5e-05		0.0029406	0.00293977	5.6e-07		0.102342	1.7e-05		0.497309	0.306783	0.551589		'' run on 01 October 2019 at 07:31					2934.68	0.614757
		1.622	0.00012		0.004768	1.6e-06		0.165734	1.9e-05		0.00294121	0.00293959	1e-06		0.102179	1.4e-05		0.702421	0.601637	0.451578		'' run on 01 October 2019 at 08:52					2936.92	1.02158
		0.568032	3.4e-05		0.00166413	1.4e-06		0.0578786	9.7e-06		0.00293408	0.00292964	2.5e-06		0.101893	1.8e-05		0.673661	0.956779	0.416858		'' run on 01 October 2019 at 10:16					2931.23	2.51438
		0.567043	5.1e-05		0.00166483	1.4e-06		0.0577721	9.2e-06		0.00294043	0.00293599	2.5e-06		0.101883	1.9e-05		0.690067	0.468635	0.517905		'' run on 01 October 2019 at 11:39					2937.73	2.51602
		1.61788	0.00019		0.00475197	1.6e-06		0.165204	2.7e-05		0.00293879	0.00293716	1e-06		0.102112	2.1e-05		0.589334	0.484984	0.462948		'' run on 01 October 2019 at 13:00					2935.5	1.04793
		3.39456	0.00036		0.00998469	1.7e-06		0.347456	5e-05		0.00294221	0.00294138	6e-07		0.102357	1.8e-05		0.706758	0.334107	0.443192		'' run on 01 October 2019 at 14:21					2936.06	0.657356
		3.39324	0.00035		0.00998059	1.8e-06		0.347408	4.6e-05		0.00294215	0.00294132	6e-07		0.102382	1.7e-05		0.556848	0.453093	0.405246		'' run on 01 October 2019 at 18:23					2935.61	0.651404
		1.61891	0.00011		0.00475771	1.6e-06		0.165369	2.1e-05		0.00294047	0.00293884	9.9e-07		0.102148	1.5e-05		0.602066	0.443535	0.442089		'' run on 01 October 2019 at 19:44					2936.63	1.01498
		0.56684	3.5e-05		0.00166509	1.4e-06		0.0577744	8.2e-06		0.00294194	0.0029375	2.5e-06		0.101924	1.6e-05		0.484988	0.304845	0.230025		'' run on 01 October 2019 at 21:07					2938.64	2.51137
		0.565819	5.6e-05		0.001662	1.5e-06		0.057641	8.9e-06		0.00294179	0.00293733	2.6e-06		0.101872	1.9e-05		0.632602	0.603015	0.428179		'' run on 01 October 2019 at 22:31					2939.25	2.61541
		1.61491	0.00019		0.00474082	1.6e-06		0.164867	3.1e-05		0.0029373	0.00293567	1e-06		0.102091	2.2e-05		0.742664	0.439853	0.527759		'' run on 01 October 2019 at 23:52					2934.31	1.05249
		3.38768	0.00039		0.00996438	1.7e-06		0.346789	4.9e-05		0.00294219	0.00294136	6e-07		0.102368	1.9e-05		0.745711	0.392495	0.619406		'' run on 02 October 2019 at 01:13					2935.87	0.663591
		3.3855	0.0003		0.00995786	1.7e-06		0.346547	4.4e-05		0.00294216	0.00294133	5.6e-07		0.102362	1.6e-05		0.719763	0.498092	0.400289		'' run on 02 October 2019 at 05:14					2935.92	0.608754
		1.61449	0.00013		0.0047439	1.5e-06		0.164934	2.1e-05		0.00293995	0.00293832	9.7e-07		0.102158	1.5e-05		0.609369	0.416883	0.180082		'' run on 02 October 2019 at 06:35					2935.96	0.99548
		0.565645	3.5e-05		0.00165985	1.5e-06		0.0576559	8.8e-06		0.0029389	0.00293445	2.6e-06		0.10193	1.7e-05		0.573761	0.321648	0.466583		'' run on 02 October 2019 at 07:59					2935.5	2.61234
		0.564279	5.7e-05		0.00165545	1.4e-06		0.0574963	1.2e-05		0.00293821	0.00293374	2.5e-06		0.101893	2.3e-05		0.648819	0.466628	0.486953		'' run on 02 October 2019 at 09:22					2935.33	2.52344
		3.07324	0.00027		0.00903536	1.7e-06		0.314253	3.9e-05		0	0.00294001	6.2e-07		0.102255	1.6e-05		0.441116	0.582587	0.206492		'' run on 19 November 2019 at 20:34					2936.21	0.664365
		1.46443	9.7e-05		0.00429561	1.6e-06		0.149341	1.9e-05		0	0.0029333	1.1e-06		0.101979	1.4e-05		0.405139	0.618212	0.523439		'' run on 19 November 2019 at 23:16					2933.62	1.11965
		3.07371	0.00028		0.00903478	1.7e-06		0.314314	4.4e-05		0	0.00293937	6.1e-07		0.102259	1.7e-05		0.529481	0.689073	0.556839		'' run on 20 November 2019 at 03:19					2935.51	0.660626
		1.46588	9.3e-05		0.00430001	1.6e-06		0.149521	1.7e-05		0	0.0029334	1.1e-06		0.102001	1.3e-05		0.508256	0.670429	0.642869		'' run on 20 November 2019 at 04:40					2933.39	1.11697
		3.07129	0.00021		0.0090274	1.8e-06		0.314084	3.9e-05		0	0.00293929	6.1e-07		0.102265	1.5e-05		0.475272	0.568062	0.694175		'' run on 20 November 2019 at 07:22					2935.34	0.649755
		1.4642	0.00014		0.00429448	1.5e-06		0.149387	2.2e-05		0	0.00293299	1.1e-06		0.102026	1.8e-05		0.579131	0.576847	0.623186		'' run on 20 November 2019 at 10:04					2932.6	1.13231
		3.06827	0.00025		0.00901944	1.7e-06		0.313765	4.5e-05		0	0.00293959	6.2e-07		0.102261	1.7e-05		0.364687	0.359159	0.4009		'' run on 20 November 2019 at 14:08					2935.69	0.669871
		1.46295	0.00011		0.00429448	1.5e-06		0.149183	2.3e-05		0	0.0029355	1e-06		0.101975	1.8e-05		0.475031	0.439465	0.519118		'' run on 20 November 2019 at 15:29					2935.87	1.03543
		3.06949	0.0003		0.00902466	1.7e-06		0.313933	3.8e-05		0	0.00294012	6.1e-07		0.102275	1.6e-05		0.423865	0.589901	0.586903		'' run on 20 November 2019 at 18:11					2936.01	0.655043
		1.46171	0.00012		0.0042912	1.6e-06		0.149078	2e-05		0	0.00293574	1.1e-06		0.101989	1.6e-05		0.423585	0.712575	0.459819		'' run on 20 November 2019 at 20:53					2935.91	1.1256
		3.06662	0.00026		0.00901317	1.7e-06		0.313636	4.4e-05		0	0.00293912	6e-07		0.102274	1.7e-05		0.221324	0.550681	0.591748		'' run on 21 November 2019 at 00:56					2935.03	0.651404
		1.46355	9.6e-05		0.00429411	1.5e-06		0.149298	1.8e-05		0	0.00293403	1e-06		0.102011	1.4e-05		0.456457	0.451886	0.287286		'' run on 21 November 2019 at 02:17					2933.88	1.02158
		3.06563	0.0002		0.00901139	1.7e-06		0.313526	3.7e-05		0	0.00293949	6e-07		0.102271	1.4e-05		0.475412	0.575766	0.505071		'' run on 21 November 2019 at 04:59					2935.44	0.635316
		1.46315	0.00011		0.00429511	1.6e-06		0.149242	2e-05		0	0.00293553	1.1e-06		0.102	1.5e-05		0.432849	0.532207	0.511935		'' run on 21 November 2019 at 07:42					2935.52	1.12253
		3.0646	0.00029		0.00900718	1.7e-06		0.313381	3.8e-05		0	0.00293911	6.1e-07		0.102258	1.6e-05		0.440279	0.736413	0.553259		'' run on 21 November 2019 at 11:45					2935.26	0.655043
		1.4613	9.1e-05		0.00428856	1.5e-06		0.14907	1.9e-05		0	0.00293475	1e-06		0.102012	1.5e-05		0.438564	0.572954	0.584644		'' run on 21 November 2019 at 13:06					2934.57	1.02473
		3.06395	0.00024		0.0090045	1.7e-06		0.313347	3.9e-05		0	0.00293885	5.9e-07		0.102269	1.5e-05		0.4108	0.523827	0.362933		'' run on 21 November 2019 at 15:48					2934.85	0.631016
		1.45928	8.9e-05		0.0042821	1.5e-06		0.148857	2e-05		0	0.0029344	1.1e-06		0.102007	1.5e-05		0.485244	0.39119	0.423208		'' run on 21 November 2019 at 18:30					2934.29	1.12253
		3.06253	0.00023		0.00900353	1.7e-06		0.31321	4.1e-05		0	0.0029399	6e-07		0.102272	1.5e-05		0.421652	0.631225	0.42609		'' run on 21 November 2019 at 22:33					2935.84	0.640376
		1.46071	8.7e-05		0.00428676	1.6e-06		0.149007	1.8e-05		0	0.0029347	1.1e-06		0.10201	1.3e-05		0.348418	0.618577	0.542365		'' run on 21 November 2019 at 23:54					2934.55	1.11697
		3.06348	0.00024		0.00900105	1.7e-06		0.3133	3.9e-05		0	0.00293818	6e-07		0.102269	1.5e-05		0.543026	0.456348	0.506406		'' run on 22 November 2019 at 02:37					2934.16	0.640376
		1.45852	0.00011		0.00428494	1.5e-06		0.148772	2e-05		0	0.00293787	1.1e-06		0.102002	1.6e-05		0.425296	0.613225	0.513726		'' run on 22 November 2019 at 05:19					2937.84	1.1256
		3.05926	0.00024		0.00899108	1.8e-06		0.312852	4.1e-05		0	0.00293898	6.2e-07		0.102264	1.6e-05		0.417379	0.489724	0.566065		'' run on 22 November 2019 at 09:22					2935.04	0.664365
		1.45985	8.1e-05		0.0042851	1.5e-06		0.148905	1.9e-05		0	0.00293529	1e-06		0.102	1.4e-05		0.473929	0.790049	0.590131		'' run on 22 November 2019 at 10:43					2935.29	1.02158
		3.05949	0.00023		0.00899261	1.7e-06		0.312955	3.7e-05		0	0.00293925	5.9e-07		0.10229	1.4e-05		0.500809	0.668618	0.650137		'' run on 22 November 2019 at 13:25					2934.93	0.62588
		1.45748	9.9e-05		0.00427859	1.5e-06		0.148702	2.2e-05		0	0.0029356	1.1e-06		0.102027	1.6e-05		0.471505	0.588113	0.611647		'' run on 22 November 2019 at 16:07					2935.21	1.1256
		3.05827	0.00022		0.00899235	1.7e-06		0.312797	3.7e-05		0	0.00294034	6e-07		0.102279	1.4e-05		0.349654	0.627056	0.324728		'' run on 22 November 2019 at 20:11					2936.18	0.635316
		1.45807	8.6e-05		0.00427864	1.5e-06		0.148753	1.9e-05		0	0.00293446	1.1e-06		0.102021	1.4e-05		0.371547	0.526024	0.439287		'' run on 22 November 2019 at 21:32					2934.15	1.11965
		3.05801	0.0002		0.00899165	1.7e-06		0.312765	4.1e-05		0	0.00294036	5.9e-07		0.102277	1.5e-05		0.502406	0.742334	0.471457		'' run on 23 November 2019 at 00:14					2936.23	0.631016
		1.45634	0.00011		0.00427433	1.5e-06		0.148546	2.2e-05		0	0.00293499	1.1e-06		0.102	1.7e-05		0.383995	0.410258	0.353736		'' run on 23 November 2019 at 02:56					2934.99	1.12886
		3.05387	0.00027		0.00897412	1.7e-06		0.312355	3.8e-05		0	0.00293861	6.1e-07		0.102282	1.5e-05		0.364683	0.538494	0.606058		'' run on 23 November 2019 at 06:59					2934.41	0.649755
		1.4568	0.0001		0.00427858	1.5e-06		0.148618	2.2e-05		0	0.00293697	1.1e-06		0.102016	1.6e-05		0.405955	0.644158	0.48141		'' run on 23 November 2019 at 08:20					2936.72	1.1256
		3.05253	0.00023		0.00897464	1.7e-06		0.312191	3.9e-05		0	0.00294006	6.1e-07		0.102273	1.5e-05		0.596212	0.724506	0.386954		'' run on 23 November 2019 at 11:02					2936	0.649755
		1.4557	0.00012		0.00427457	1.6e-06		0.148475	1.9e-05		0	0.00293644	1.1e-06		0.101996	1.5e-05		0.343619	0.413511	0.451958		'' run on 23 November 2019 at 13:44					2936.5	1.12253
		3.05166	0.00024		0.00896786	1.7e-06		0.312095	4e-05		0	0.00293869	6e-07		0.102271	1.5e-05		0.352931	0.723055	0.373091		'' run on 23 November 2019 at 17:48					2934.65	0.640376
		1.45487	9.4e-05		0.00427062	1.5e-06		0.148413	1.8e-05		0	0.00293539	1.1e-06		0.102011	1.4e-05		0.465407	0.64254	0.698603		'' run on 23 November 2019 at 19:09					2935.23	1.11965
		3.05067	0.00022		0.00896674	1.7e-06		0.312048	3.6e-05		0	0.00293927	5.8e-07		0.102289	1.4e-05		0.348902	0.425099	0.335119		'' run on 23 November 2019 at 21:51					2934.97	0.616463
		1.45407	0.00011		0.00426654	1.5e-06		0.148303	2.3e-05		0	0.0029342	1e-06		0.101992	1.7e-05		0.473259	0.495622	0.534692		'' run on 24 November 2019 at 00:33					2934.33	1.03166
		3.04824	0.00022		0.00896188	1.7e-06		0.311708	3.7e-05		0	0.00294001	6e-07		0.102258	1.4e-05		0.277829	0.669185	0.528164		'' run on 24 November 2019 at 04:36					2936.16	0.635316
		1.4527	8.8e-05		0.00426566	1.5e-06		0.148231	1.8e-05		0	0.00293638	1.1e-06		0.102039	1.4e-05		0.261124	0.639474	0.491612		'' run on 24 November 2019 at 05:57					2935.8	1.11965
		3.04419	0.00041		0.00894999	1.7e-06		0.31131	4.6e-05		0	0.00294002	6.9e-07		0.102264	2e-05		0.514943	0.722473	0.470447		'' run on 24 November 2019 at 08:55					2936.09	0.751754
		1.45006	0.00016		0.00425576	1.5e-06		0.147848	2.1e-05		0	0.00293489	1.1e-06		0.10196	1.8e-05		0.410201	0.549197	0.423473		'' run on 24 November 2019 at 12:08					2935.48	1.13231
		3.04127	0.00036		0.00893634	1.7e-06		0.310959	4.8e-05		0	0.00293836	6.6e-07		0.102247	2e-05		0.370876	0.487717	0.370496		'' run on 24 November 2019 at 16:57					2934.68	0.724316
		1.44854	0.00015		0.0042525	1.5e-06		0.147737	2.3e-05		0	0.00293572	1.1e-06		0.10199	1.9e-05		0.462336	0.662051	0.525983		'' run on 24 November 2019 at 18:33					2935.86	1.13594
		3.0292	0.00034		0.00890515	1.7e-06		0.309749	4.5e-05		0	0.00293977	6.6e-07		0.102254	1.9e-05		0.743653	0.784241	0.641161		'' run on 03 December 2019 at 04:05					2935.97	0.718298
		1.44652	0.00015		0.00424387	1.5e-06		0.147461	2.3e-05		0	0.00293385	1.1e-06		0.101942	1.9e-05		0.710208	0.42526	0.545887		'' run on 03 December 2019 at 05:54					2934.71	1.13594
		3.02879	0.00036		0.00890238	1.7e-06		0.309678	4.5e-05		0	0.00293926	6.6e-07		0.102245	1.9e-05		0.878684	0.766273	0.774454		'' run on 03 December 2019 at 11:20					2935.6	0.718298
		3.03299	0.00044		0.00891648	1.8e-06		0.310092	4.6e-05		0	0.00293983	7.3e-07		0.10224	2.1e-05		0.583178	0.586644	0.477217		'' run on 04 December 2019 at 03:56					2936.26	0.794392
		1.44635	0.00016		0.00424514	1.5e-06		0.147472	2.9e-05		0	0.00293506	1.1e-06		0.101961	2.3e-05		0.637278	0.504485	0.55753		'' run on 04 December 2019 at 05:45					2935.64	1.15228
		3.03272	0.00029		0.00891351	1.8e-06		0.310175	4.4e-05		0	0.00293912	6.6e-07		0.102276	1.7e-05		0.671659	0.484031	0.39055		'' run on 04 December 2019 at 10:03					2935	0.707055
		1.44846	8.7e-05		0.00425168	1.6e-06		0.147765	2e-05		0	0.0029353	1.1e-06		0.102015	1.5e-05		0.456565	0.602539	0.50542		'' run on 04 December 2019 at 11:29					2935.08	1.12253
		3.02949	0.00025		0.00890989	1.7e-06		0.30991	4.3e-05		0	0.00294106	6.2e-07		0.102298	1.6e-05		0.522809	0.659753	0.5388		'' run on 04 December 2019 at 15:47					2936.61	0.664365
		1.44626	9.4e-05		0.00424254	1.6e-06		0.147507	2.1e-05		0	0.00293345	1.1e-06		0.101992	1.6e-05		0.482418	0.593496	0.599406		'' run on 04 December 2019 at 17:13					2933.57	1.1256
		3.0302	0.00044		0.00890778	1.7e-06		0.3099	4.7e-05		0	0.00293967	7.1e-07		0.102271	2.1e-05		0.7611	0.687892	0.487253		'' run on 04 December 2019 at 22:39					2935.63	0.776054
		1.44455	0.00017		0.00424104	1.6e-06		0.147349	2.5e-05		0	0.0029359	1.2e-06		0.102004	2.1e-05		0.625454	0.660332	0.606382		'' run on 05 December 2019 at 00:28					2935.84	1.24023
		3.03026	0.00027		0.00890904	1.8e-06		0.309963	4e-05		0	0.00294002	6.5e-07		0.102289	1.6e-05		0.539534	0.723912	0.642256		'' run on 05 December 2019 at 04:46					2935.71	0.692446
		1.44613	0.00014		0.00424515	1.6e-06		0.147518	2.3e-05		0	0.00293553	1.1e-06		0.102009	1.9e-05		0.614866	0.538213	0.303631		'' run on 05 December 2019 at 06:12					2935.39	1.13594
		3.0283	0.00035		0.008903	1.6e-06		0.309647	4e-05		0	0.00293993	6.4e-07		0.102251	1.8e-05		0.578988	0.372465	0.367853		'' run on 05 December 2019 at 10:30					2936.19	0.694058
		1.44489	0.00012		0.00424128	1.5e-06		0.147386	1.8e-05		0	0.00293538	1.1e-06		0.102005	1.5e-05		0.454365	0.482352	0.27364		'' run on 05 December 2019 at 11:56					2935.3	1.12253
		3.02367	0.00044		0.00888789	1.7e-06		0.309227	4.3e-05		0	0.00293944	7e-07		0.102269	2.1e-05		0.610195	0.610628	0.397482		'' run on 05 December 2019 at 23:14					2935.43	0.766915
		1.44235	0.00018		0.0042373	1.6e-06		0.147118	2.1e-05		0	0.00293777	1.2e-06		0.101998	1.9e-05		0.818274	0.549599	0.575554		'' run on 06 December 2019 at 01:03					2937.79	1.23303
		3.02842	0.00033		0.0089023	1.7e-06		0.309653	3.6e-05		0	0.00293958	6.4e-07		0.102249	1.6e-05		0.696562	0.460929	0.632854		'' run on 06 December 2019 at 05:21					2935.87	0.683068
		1.44448	0.00016		0.00424132	1.5e-06		0.14735	2.1e-05		0	0.00293622	1.1e-06		0.102009	1.8e-05		0.76357	0.418035	0.451936		'' run on 06 December 2019 at 06:47					2936.09	1.13231
		3.02469	0.00029		0.00889171	1.7e-06		0.309356	4.1e-05		0	0.00293971	6.4e-07		0.102277	1.7e-05		0.366048	0.545512	0.505281		'' run on 06 December 2019 at 11:05					2935.58	0.688423
		3.02229	0.00034		0.00887998	1.8e-06		0.309022	4.5e-05		0	0.00293817	6.8e-07		0.102248	1.9e-05		0.701795	0.676531	0.607866		'' run on 07 December 2019 at 01:49					2934.47	0.736717
		1.44168	0.00017		0.0042305	1.5e-06		0.146992	2.2e-05		0	0.00293443	1.1e-06		0.101959	1.9e-05		0.695368	0.615501	0.548637		'' run on 07 December 2019 at 03:38					2935.03	1.13594
		3.02061	0.00027		0.00888231	1.7e-06		0.308926	4e-05		0	0.00294057	6.3e-07		0.102273	1.6e-05		0.626116	0.589963	0.476168		'' run on 07 December 2019 at 07:56					2936.5	0.673707
		1.44162	9.9e-05		0.0042331	1.5e-06		0.14708	2e-05		0	0.00293635	1.1e-06		0.102024	1.5e-05		0.643232	0.41032	0.536272		'' run on 07 December 2019 at 09:22					2935.99	1.12253
		3.0202	0.00027		0.00887772	1.7e-06		0.308975	4.6e-05		0	0.00293945	6.2e-07		0.102303	1.8e-05		0.464534	0.403784	0.406931		'' run on 07 December 2019 at 13:40					2934.93	0.67566
		1.43939	0.00011		0.00422478	1.5e-06		0.146863	1.9e-05		0	0.00293511	1.1e-06		0.102031	1.5e-05		0.680727	0.603416	0.580052		'' run on 07 December 2019 at 15:06					2934.65	1.12253
		3.01759	0.00034		0.00887209	1.7e-06		0.308614	4.2e-05		0	0.00294012	6.5e-07		0.102272	1.8e-05		0.628873	0.571977	0.530672		'' run on 07 December 2019 at 20:32					2936.07	0.70329
		1.43855	0.00016		0.00422463	1.5e-06		0.146753	2.1e-05		0	0.00293672	1.1e-06		0.102014	1.8e-05		0.647747	0.665745	0.466473		'' run on 07 December 2019 at 22:21					2936.51	1.13231
		3.01762	0.00025		0.0088692	1.7e-06		0.308614	4.2e-05		0	0.00293914	6.2e-07		0.102271	1.6e-05		0.585916	0.547293	0.459355		'' run on 08 December 2019 at 02:39					2935.1	0.664365
		1.43979	0.00015		0.00422681	1.5e-06		0.146942	2.4e-05		0	0.00293571	1.1e-06		0.102058	1.9e-05		0.685815	0.63028	0.615528		'' run on 08 December 2019 at 04:05					2934.84	1.13594
		3.01667	0.00034		0.00886734	1.8e-06		0.308513	4.7e-05		0	0.00293944	6.7e-07		0.102269	1.9e-05		0.67879	0.588966	0.675761		'' run on 08 December 2019 at 08:23					2935.43	0.727498
		1.4382	0.00011		0.00422256	1.6e-06		0.146723	1.8e-05		0	0.00293601	1.1e-06		0.102019	1.5e-05		0.562928	0.382204	0.492997		'' run on 08 December 2019 at 09:49					2935.73	1.12253
		3.00972	0.00034		0.0088453	1.7e-06		0.307823	4.9e-05		0	0.00293892	6.5e-07		0.102276	2e-05		0.804625	0.690045	0.563473		'' run on 08 December 2019 at 15:15					2934.8	0.715216
		1.43726	0.00016		0.00421837	1.5e-06		0.146544	2.1e-05		0	0.002935	1.1e-06		0.10196	1.9e-05		0.719857	0.568408	0.502558		'' run on 08 December 2019 at 17:04					2935.6	1.13594
		3.0115	0.00029		0.00885234	1.7e-06		0.308043	4.3e-05		0	0.00293951	6.3e-07		0.102289	1.7e-05		0.718556	0.585256	0.525778		'' run on 08 December 2019 at 21:22					2935.2	0.679137
		1.43806	9.3e-05		0.0042235	1.6e-06		0.146713	1.9e-05		0	0.00293695	1.1e-06		0.102022	1.5e-05		0.595354	0.673587	0.537344		'' run on 08 December 2019 at 22:48					2936.63	1.12253
		3.01298	0.00028		0.0088602	1.7e-06		0.308186	4.5e-05		0	0.00294068	6.4e-07		0.102286	1.8e-05		0.673393	0.71364	0.525272		'' run on 09 December 2019 at 03:06					2936.41	0.694058
		1.43716	0.00015		0.00421894	1.6e-06		0.146613	2.1e-05		0	0.0029356	1.1e-06		0.102015	1.8e-05		0.52821	0.6285	0.495262		'' run on 09 December 2019 at 04:32					2935.37	1.13231
		3.00872	0.0004		0.00884629	1.7e-06		0.307709	4.7e-05		0	0.00294021	6.9e-07		0.102272	2.1e-05		0.683412	0.571456	0.5612		'' run on 09 December 2019 at 09:58					2936.16	0.757799
		1.43507	0.00016		0.00421178	1.5e-06		0.146356	2.3e-05		0	0.0029349	1.1e-06		0.101985	2e-05		0.539926	0.563762	0.529686		'' run on 09 December 2019 at 11:47					2935.11	1.13975
		3.00735	0.00036		0.00884547	1.7e-06		0.307678	4.1e-05		0	0.00294128	6.6e-07		0.102309	1.8e-05		0.552188	0.575626	0.422605		'' run on 09 December 2019 at 16:05					2936.68	0.712543
		1.4344	9.4e-05		0.00420963	1.6e-06		0.146342	2e-05		0	0.00293477	1.1e-06		0.102023	1.5e-05		0.521037	0.415005	0.356614		'' run on 09 December 2019 at 17:31					2934.42	1.12253
		3.00691	0.0004		0.0088434	1.7e-06		0.307566	4.4e-05		0	0.00294103	7e-07		0.102287	2e-05		0.69211	0.706747	0.356264		'' run on 09 December 2019 at 21:49					2936.75	0.760942
		1.43544	0.00013		0.00421787	1.6e-06		0.146435	2.1e-05		0	0.00293838	1.1e-06		0.102014	1.7e-05		0.68209	0.744971	0.512315		'' run on 09 December 2019 at 23:15					2938.17	1.12886

## Sheet: sample 2
		All uncertainties (u) herein are 1 standard uncertainty
		includes			21Ne includes baseline decay correction							with	uncertainty			uncertainty											1e6*	1e6*
		blank										NeH	k=1			k=1											D21	D21
		and HF			error does not include allowance for error							correction																u(k=1)
		correction			in amplifier decay correction
		20Ne Volts	u(k=1)		21Ne Volts	u(k=1)		22Ne Volts	u(k=1)			21Ne/20Ne			22Ne/20Ne			side 20	side 21	side 22
		2.12839	0.00023		0.006245	1.6e-06		0.216822	3.3e-05			0.00293414	8.2e-07		0.101871	1.9e-05		0.801773	0.593727	0.478448		'' run on 27 September 2019 at 19:04					2936.06	0.867613
		2.12473	0.00021		0.00623985	1.6e-06		0.216579	3.1e-05			0.00293677	8.2e-07		0.101932	1.8e-05		0.52081	0.614404	0.544361		'' run on 28 September 2019 at 06:01					2937.78	0.862854
		2.1252	0.00018		0.00623985	1.6e-06		0.216588	3e-05			0.00293612	7.9e-07		0.101914	1.7e-05		0.719144	0.349324	0.571627		'' run on 28 September 2019 at 16:59					2937.4	0.829715
		2.12261	0.00021		0.00623221	1.6e-06		0.216352	3.1e-05			0.0029361	8.1e-07		0.101927	1.8e-05		0.593957	0.591182	0.444173		'' run on 29 September 2019 at 03:56					2937.19	0.853356
		2.12336	0.0002		0.00623367	1.6e-06		0.216499	2.7e-05			0.00293576	8.1e-07		0.10196	1.6e-05		0.680781	0.546389	0.410091		'' run on 29 September 2019 at 14:48					2936.35	0.844441
		2.12135	0.00018		0.00622876	1.6e-06		0.216273	3e-05			0.00293622	7.9e-07		0.101951	1.6e-05		0.516851	0.313972	0.527085		'' run on 30 September 2019 at 01:44					2936.96	0.825277
		2.12057	0.00024		0.00622466	1.6e-06		0.216151	3.3e-05			0.00293536	8.4e-07		0.10193	1.9e-05		0.563499	0.454653	0.508377		'' run on 30 September 2019 at 14:50					2936.4	0.88654
		2.12128	0.00026		0.00622726	1.6e-06		0.216165	3.1e-05			0.00293562	8.2e-07		0.101903	1.9e-05		0.728817	0.559205	0.57783		'' run on 30 September 2019 at 19:19					2937.06	0.867613
		2.11926	0.00023		0.00622154	1.6e-06		0.216089	3e-05			0.00293572	8.1e-07		0.101965	1.8e-05		0.610383	0.35677	0.596422		'' run on 01 October 2019 at 06:10					2936.25	0.853356
		2.11822	0.00022		0.00622141	1.6e-06		0.215898	3.1e-05			0.0029371	8.3e-07		0.101924	1.8e-05		0.396088	0.422746	0.501538		'' run on 01 October 2019 at 17:02					2938.23	0.872363
		2.11743	0.00021		0.00621887	1.6e-06		0.215893	3.1e-05			0.00293699	7.9e-07		0.10196	1.8e-05		0.712291	0.465894	0.468514		'' run on 02 October 2019 at 03:53					2937.59	0.834396
		2.09368	0.00033		0.00614782	1.6e-06		0.213603	3.9e-05			0.00293636	9.1e-07		0.102022	2.4e-05		0.757711	0.517132	0.466008		'' run on 07 October 2019 at 18:23					2936.03	0.97791
		2.09626	0.00023		0.00615145	1.6e-06		0.213833	3.3e-05			0.00293449	8.3e-07		0.102007	1.9e-05		0.775672	0.422548	0.551895		'' run on 07 October 2019 at 19:45					2934.39	0.87707
		2.09586	0.00021		0.00615375	1.6e-06		0.213851	3.3e-05			0.00293614	8.1e-07		0.102035	1.9e-05		0.796316	0.519585	0.591327		'' run on 07 October 2019 at 21:07					2935.62	0.858168
		2.09545	0.00021		0.00615074	1.6e-06		0.213839	2.9e-05			0.00293528	8.1e-07		0.102049	1.7e-05		0.800635	0.661759	0.501651		'' run on 07 October 2019 at 22:30					2934.55	0.848779
		2.09484	0.00022		0.00614812	1.6e-06		0.213753	3.5e-05			0.00293488	8.2e-07		0.102038	2e-05		0.756261	0.775846	0.718803		'' run on 07 October 2019 at 23:52					2934.32	0.872602
		2.09485	0.00022		0.00615048	1.6e-06		0.213769	3e-05			0.002936	8.2e-07		0.102045	1.8e-05		0.638997	0.567546	0.362868		'' run on 08 October 2019 at 01:14					2935.33	0.862854
		4.14511	0.00067		0.012179	1.9e-06		0.42336	6.8e-05			0.00293817	6.6e-07		0.102135	2.3e-05		0.567245	0.625012	0.450268		'' run on 19 November 2019 at 17:36					2936.16	0.743873
		4.14766	0.00053		0.0121838	1.8e-06		0.423547	6.4e-05			0.00293752	5.7e-07		0.102117	2e-05		0.54564	0.579047	0.508269		'' run on 19 November 2019 at 19:13					2935.77	0.643377
		1.98967	0.00015		0.00583978	1.6e-06		0.202728	2.6e-05			0.00293505	8.4e-07		0.10189	1.5e-05		0.374247	0.431135	0.498447		'' run on 19 November 2019 at 21:55					2936.69	0.869299
		4.14674	0.00037		0.0121821	1.9e-06		0.423501	5.1e-05			0.00293776	5.2e-07		0.102129	1.5e-05		0.438655	0.620567	0.596107		'' run on 20 November 2019 at 00:37					2935.84	0.566111
		1.98979	0.00011		0.00583785	3.1e-06		0.202775	2.2e-05			0.0029339	1.5e-06		0.101908	1.2e-05		0.267931	0.309336	0.372958		'' run on 20 November 2019 at 01:58					2935.28	1.51065
		4.14628	0.0004		0.012179	1.8e-06		0.423486	6.1e-05			0.00293734	5.3e-07		0.102136	1.8e-05		0.47525	0.523393	0.631635		'' run on 20 November 2019 at 06:01					2935.3	0.594152
		1.98833	0.00012		0.00583782	1.6e-06		0.20264	2.6e-05			0.00293605	8.3e-07		0.101915	1.4e-05		0.373641	0.459502	0.563638		'' run on 20 November 2019 at 08:43					2937.32	0.855878
		4.14404	0.00043		0.0121786	1.9e-06		0.423233	7.6e-05			0.00293883	5.5e-07		0.102131	2.1e-05		0.374695	0.516401	0.60466		'' run on 20 November 2019 at 11:26					2936.88	0.632977
		1.98839	0.00014		0.00583594	1.6e-06		0.202602	2.8e-05			0.00293501	8.3e-07		0.101893	1.6e-05		0.350262	0.476544	0.337925		'' run on 20 November 2019 at 12:47					2936.62	0.863644
		4.14126	0.00039		0.0121654	1.8e-06		0.423034	7.4e-05			0.00293761	5.2e-07		0.102151	2e-05		0.300035	0.661505	0.510651		'' run on 20 November 2019 at 16:50					2935.36	0.599528
		1.98648	0.00016		0.00582999	1.6e-06		0.202411	2.7e-05			0.00293483	8.4e-07		0.101894	1.6e-05		0.503745	0.631575	0.578393		'' run on 20 November 2019 at 19:32					2936.41	0.873259
		4.13983	0.00047		0.0121604	1.8e-06		0.42292	6.7e-05			0.00293742	5.5e-07		0.102159	2e-05		0.494886	0.642697	0.560725		'' run on 20 November 2019 at 22:14					2935.05	0.625726
		1.98598	0.00011		0.00583116	1.5e-06		0.202376	2.5e-05			0.00293616	7.9e-07		0.101902	1.4e-05		0.389715	0.482993	0.507066		'' run on 20 November 2019 at 23:35					2937.62	0.817145
		4.13875	0.00038		0.012158	1.9e-06		0.422748	5.7e-05			0.00293761	5.2e-07		0.102144	1.7e-05		0.303139	0.638627	0.342469		'' run on 21 November 2019 at 03:38					2935.46	0.578556
		1.98526	0.00015		0.00582848	1.6e-06		0.202281	3e-05			0.00293588	8.6e-07		0.101892	1.7e-05		0.292499	0.529213	0.485262		'' run on 21 November 2019 at 06:21					2937.5	0.89662
		4.13684	0.0004		0.0121534	1.8e-06		0.422562	5.8e-05			0.00293785	5.2e-07		0.102146	1.7e-05		0.288357	0.778687	0.382148		'' run on 21 November 2019 at 09:03					2935.67	0.578556
		1.98511	0.00011		0.00582389	1.6e-06		0.202289	2e-05			0.00293379	8.2e-07		0.101903	1.2e-05		0.344617	0.519594	0.406884		'' run on 21 November 2019 at 10:24					2935.23	0.839316
		4.13387	0.00043		0.0121455	1.8e-06		0.422326	6.3e-05			0.00293805	5.3e-07		0.102163	1.9e-05		0.276776	0.545446	0.400298		'' run on 21 November 2019 at 14:27					2935.62	0.601043
		1.98301	0.00014		0.00582081	1.7e-06		0.202084	2.6e-05			0.00293534	8.6e-07		0.101907	1.5e-05		0.621723	0.531913	0.515461		'' run on 21 November 2019 at 17:09					2936.72	0.88864
		4.13287	0.00039		0.0121445	1.8e-06		0.422124	6e-05			0.00293851	5.2e-07		0.102138	1.7e-05		0.395928	0.557045	0.677578		'' run on 21 November 2019 at 19:51					2936.45	0.578556
		1.98242	0.00012		0.00581958	1.7e-06		0.202026	2.4e-05			0.00293559	8.6e-07		0.101908	1.4e-05		0.368508	0.589232	0.508952		'' run on 21 November 2019 at 21:12					2936.95	0.885001
		4.13159	0.00042		0.0121373	1.9e-06		0.421995	5.7e-05			0.00293768	5.5e-07		0.102139	1.7e-05		0.422052	0.387077	0.576679		'' run on 22 November 2019 at 01:16					2935.61	0.605662
		1.98164	0.00012		0.00581416	1.6e-06		0.201964	2.4e-05			0.00293401	8.2e-07		0.101917	1.4e-05		0.357424	0.525368	0.590795		'' run on 22 November 2019 at 03:58					2935.25	0.846183
		4.1298	0.00038		0.0121299	1.8e-06		0.421886	5.1e-05			0.00293716	5.1e-07		0.102156	1.6e-05		0.327758	0.604825	0.588461		'' run on 22 November 2019 at 06:40					2934.82	0.5631
		1.98102	0.00011		0.00581464	1.6e-06		0.201876	2.4e-05			0.00293517	8.1e-07		0.101905	1.3e-05		0.265693	0.536736	0.538375		'' run on 22 November 2019 at 08:01					2936.58	0.832897
		4.12891	0.0004		0.0121326	1.8e-06		0.421758	5.6e-05			0.00293845	5.1e-07		0.102148	1.7e-05		0.483652	0.546632	0.501612		'' run on 22 November 2019 at 12:04					2936.24	0.569585
		1.97919	0.00015		0.00580797	1.6e-06		0.201708	2.6e-05			0.00293452	8.5e-07		0.101914	1.5e-05		0.539511	0.631632	0.597504		'' run on 22 November 2019 at 14:46					2935.79	0.878966
		4.12623	0.00048		0.0121224	2e-06		0.42155	5.7e-05			0.00293788	5.8e-07		0.102164	1.8e-05		0.337676	0.552745	0.485318		'' run on 22 November 2019 at 17:28					2935.44	0.639153
		1.98084	0.00012		0.00581315	1.6e-06		0.201796	2.2e-05			0.00293468	8.1e-07		0.101874	1.3e-05		0.472835	0.50984	0.403675		'' run on 22 November 2019 at 18:49					2936.56	0.832897
		4.12616	0.00049		0.0121243	1.9e-06		0.421434	6.6e-05			0.00293839	5.7e-07		0.102137	2e-05		0.39963	0.506779	0.489871		'' run on 22 November 2019 at 22:53					2936.35	0.643377
		1.97841	0.00017		0.00580551	1.6e-06		0.20162	2.6e-05			0.00293444	8.5e-07		0.10191	1.6e-05		0.392154	0.54783	0.480136		'' run on 23 November 2019 at 01:35					2935.78	0.882882
		4.12343	0.00041		0.0121145	1.8e-06		0.421181	6.2e-05			0.00293796	5.3e-07		0.102144	1.8e-05		0.560742	0.719027	0.497894		'' run on 23 November 2019 at 04:17					2935.82	0.594152
		1.97817	8.9e-05		0.00580404	1.6e-06		0.201589	1.9e-05			0.00293404	8.2e-07		0.101907	1.1e-05		0.435576	0.454027	0.407738		'' run on 23 November 2019 at 05:38					2935.43	0.836261
		4.12305	0.0004		0.0121191	1.8e-06		0.421127	5.6e-05			0.00293934	5.3e-07		0.10214	1.7e-05		0.427327	0.731716	0.346477		'' run on 23 November 2019 at 09:41					2937.26	0.58756
		1.97743	0.0001		0.00579826	1.6e-06		0.201514	2.5e-05			0.00293223	8e-07		0.101907	1.4e-05		0.393612	0.270304	0.52395		'' run on 23 November 2019 at 12:23					2933.61	0.826817
		4.12106	0.00039		0.0121085	1.8e-06		0.420949	6.1e-05			0.00293821	5.1e-07		0.102146	1.8e-05		0.417405	0.676132	0.706003		'' run on 23 November 2019 at 15:06					2936.04	0.576383
		1.97586	0.00011		0.00579784	1.6e-06		0.201348	2.3e-05			0.00293433	8.4e-07		0.101904	1.3e-05		0.327651	0.321484	0.420508		'' run on 23 November 2019 at 16:27					2935.77	0.8621
		4.11792	0.00034		0.0120992	1.8e-06		0.420643	5.5e-05			0.00293819	5.1e-07		0.102149	1.6e-05		0.274152	0.683214	0.614122		'' run on 23 November 2019 at 20:30					2935.97	0.5631
		1.97456	0.00015		0.00579328	1.6e-06		0.201199	2.5e-05			0.00293395	8.3e-07		0.101896	1.5e-05		0.471827	0.508581	0.450633		'' run on 23 November 2019 at 23:12					2935.51	0.85964
		4.11491	0.00045		0.0120926	1.9e-06		0.420311	7.3e-05			0.00293873	5.6e-07		0.102143	2.1e-05		0.326478	0.475215	0.443734		'' run on 24 November 2019 at 01:54					2936.59	0.641685
		1.97274	0.00013		0.00578976	1.6e-06		0.201037	2.4e-05			0.00293489	8.3e-07		0.101908	1.4e-05		0.336961	0.383364	0.443256		'' run on 24 November 2019 at 03:15					2936.26	0.855878
		4.1132	0.00032		0.0120839	1.8e-06		0.420142	5.7e-05			0.00293783	4.9e-07		0.102145	1.6e-05		0.358844	0.463893	0.312796		'' run on 24 November 2019 at 07:18					2935.68	0.545052
		1.96934	0.00021		0.0057826	1.6e-06		0.200628	2.5e-05			0.00293631	8.7e-07		0.101876	1.7e-05		0.506231	0.645498	0.715917		'' run on 24 November 2019 at 10:31					2938.17	0.906216
		4.10686	0.00044		0.0120676	1.8e-06		0.419535	5e-05			0.0029384	5.4e-07		0.102155	1.6e-05		0.215275	0.667138	0.423453		'' run on 24 November 2019 at 13:44					2936.09	0.590408
		4.04177	0.00088		0.0118839	1.9e-06		0.413053	8.5e-05			0.00294027	7.9e-07		0.102196	3.1e-05		0.64462	0.468413	0.174745		'' run on 03 December 2019 at 00:27					2937.35	0.915425
		1.94303	0.00025		0.0057075	1.6e-06		0.198088	3.5e-05			0.00293742	8.8e-07		0.101948	2.2e-05		0.602511	0.617252	0.429504		'' run on 03 December 2019 at 02:16					2938.2	0.939218
		4.04713	0.0004		0.011895	1.9e-06		0.413535	5.7e-05			0.00293913	5.4e-07		0.10218	1.7e-05		0.592864	0.445952	0.298087		'' run on 03 December 2019 at 07:42					2936.44	0.596596
		1.94275	0.00017		0.00570363	1.6e-06		0.198103	3e-05			0.00293586	8.4e-07		0.101971	1.8e-05		0.63669	0.478235	0.446487		'' run on 03 December 2019 at 09:31					2936.3	0.881883
		4.04057	0.00067		0.0118744	1.8e-06		0.412762	7.8e-05			0.00293879	6.6e-07		0.102154	2.6e-05		0.681613	0.377046	0.266666		'' run on 04 December 2019 at 00:19					2936.49	0.76555
		1.94035	0.0002		0.00569601	1.6e-06		0.197789	2.8e-05			0.00293556	8.7e-07		0.101935	1.8e-05		0.672357	0.580283	0.443965		'' run on 04 December 2019 at 02:07					2936.53	0.910504
		4.04361	0.00047		0.0118836	1.9e-06		0.413218	6.4e-05			0.00293886	5.8e-07		0.10219	2e-05		0.472095	0.549675	0.365263		'' run on 04 December 2019 at 07:11					2936.02	0.652253
		1.94152	0.00021		0.00569824	1.6e-06		0.197961	2.4e-05			0.00293494	8.6e-07		0.101962	1.7e-05		0.666012	0.482764	0.572325		'' run on 04 December 2019 at 08:37					2935.5	0.89662
		4.04386	0.00044		0.0118802	1.8e-06		0.413116	5.6e-05			0.00293784	5.4e-07		0.102159	1.8e-05		0.566621	0.51354	0.386153		'' run on 04 December 2019 at 12:55					2935.47	0.60309
		1.94126	0.00013		0.00569794	1.6e-06		0.197925	2.2e-05			0.00293517	8.5e-07		0.101957	1.3e-05		0.676534	0.5898	0.509567		'' run on 04 December 2019 at 14:21					2935.81	0.871847
		4.04088	0.00057		0.0118772	1.9e-06		0.412759	6.2e-05			0.00293926	6.3e-07		0.102146	2.1e-05		0.595889	0.483694	0.439565		'' run on 04 December 2019 at 19:02					2937.08	0.703605
		1.93848	0.00018		0.00568954	1.6e-06		0.197594	2.6e-05			0.00293505	8.5e-07		0.101932	1.6e-05		0.603969	0.596901	0.580327		'' run on 04 December 2019 at 20:50					2936.06	0.882882
		4.03962	0.00067		0.0118741	1.8e-06		0.412776	6.3e-05			0.00293941	6.7e-07		0.102182	2.3e-05		0.784768	0.614074	0.499817		'' run on 05 December 2019 at 01:54					2936.7	0.752759
		1.93923	0.00012		0.00569592	1.6e-06		0.19772	2.1e-05			0.0029372	8.4e-07		0.101958	1.3e-05		0.50376	0.392971	0.361468		'' run on 05 December 2019 at 03:20					2937.83	0.8621
		4.03952	0.00039		0.0118701	1.8e-06		0.412801	6e-05			0.00293849	5.3e-07		0.102191	1.8e-05		0.552978	0.572302	0.450424		'' run on 05 December 2019 at 07:38					2935.65	0.594152
		1.93895	0.00018		0.00569076	1.6e-06		0.197692	2.8e-05			0.00293496	8.7e-07		0.101958	1.7e-05		0.663927	0.63389	0.459514		'' run on 05 December 2019 at 09:04					2935.59	0.906216
		4.03078	0.00069		0.0118442	1.8e-06		0.411704	7.8e-05			0.00293845	6.8e-07		0.10214	2.6e-05		0.786457	0.601768	0.546123		'' run on 05 December 2019 at 19:36					2936.36	0.782858
		1.93405	0.00022		0.00567868	1.6e-06		0.197145	3e-05			0.00293616	8.8e-07		0.101934	2e-05		0.621742	0.421655	0.422434		'' run on 05 December 2019 at 21:25					2937.15	0.929211
		4.0313	0.00046		0.011848	1.8e-06		0.41199	5.5e-05			0.00293899	5.7e-07		0.102198	1.8e-05		0.567109	0.631796	0.5947		'' run on 06 December 2019 at 02:29					2936.04	0.630093
		1.93468	0.00024		0.00568333	1.6e-06		0.197253	2.5e-05			0.00293761	9.1e-07		0.101957	1.8e-05		0.797661	0.613255	0.341829		'' run on 06 December 2019 at 03:55					2938.26	0.948798
		4.02947	0.00041		0.0118424	1.8e-06		0.411696	5.7e-05			0.00293896	5.4e-07		0.102171	1.8e-05		0.477454	0.530868	0.43939		'' run on 06 December 2019 at 08:13					2936.4	0.60309
		1.93404	0.00018		0.0056794	1.6e-06		0.197222	2.2e-05			0.00293655	8.7e-07		0.101974	1.5e-05		0.585352	0.480288	0.318129		'' run on 06 December 2019 at 09:39					2936.94	0.898321
		4.02107	0.00055		0.0118176	1.9e-06		0.410846	6.9e-05			0.00293892	6.1e-07		0.102173	2.2e-05		0.735695	0.450814	0.544713		'' run on 06 December 2019 at 16:35					2936.34	0.692698
		4.0122	0.00063		0.011795	1.9e-06		0.409885	6.6e-05			0.00293978	6.6e-07		0.10216	2.3e-05		0.649284	0.654885	0.546016		'' run on 06 December 2019 at 22:12					2937.4	0.743873
		1.92548	0.0002		0.00565394	1.6e-06		0.196254	2.9e-05			0.00293638	8.8e-07		0.101925	1.8e-05		0.699856	0.608727	0.526162		'' run on 07 December 2019 at 00:01					2937.5	0.920064
		4.0135	0.0005		0.0117987	1.8e-06		0.410132	5.6e-05			0.00293975	5.8e-07		0.102188	1.9e-05		0.846061	0.472678	0.45604		'' run on 07 December 2019 at 05:04					2936.94	0.645564
		1.92608	0.00013		0.00565749	1.6e-06		0.196406	2.6e-05			0.0029373	8.5e-07		0.101972	1.5e-05		0.473407	0.609642	0.487426		'' run on 07 December 2019 at 06:30					2937.73	0.878966
		4.01328	0.00041		0.0117967	1.8e-06		0.410073	6e-05			0.00293941	5.3e-07		0.102179	1.8e-05		0.594865	0.479922	0.448959		'' run on 07 December 2019 at 10:48					2936.74	0.594152
		1.92587	0.00016		0.00565586	1.6e-06		0.196376	2.5e-05			0.00293679	8.9e-07		0.101967	1.6e-05		0.686044	0.78589	0.572091		'' run on 07 December 2019 at 12:14					2937.27	0.921456
		4.01006	0.00047		0.011784	1.8e-06		0.409737	6.4e-05			0.0029386	5.7e-07		0.102177	2e-05		0.702285	0.593737	0.423867		'' run on 07 December 2019 at 16:55					2935.96	0.643377
		1.92303	0.00018		0.00565148	1.5e-06		0.196061	2.4e-05			0.00293884	8.5e-07		0.101954	1.6e-05		0.481001	0.479704	0.366732		'' run on 07 December 2019 at 18:44					2939.52	0.882882
		4.00959	0.00043		0.0117866	1.9e-06		0.409646	6.2e-05			0.0029396	5.6e-07		0.102167	1.9e-05		0.610792	0.514731	0.291976		'' run on 07 December 2019 at 23:47					2937.11	0.627656
		1.92418	0.00013		0.00564649	1.6e-06		0.196176	2.4e-05			0.00293449	8.5e-07		0.101953	1.4e-05		0.672405	0.466329	0.525539		'' run on 08 December 2019 at 01:13					2935.19	0.875286
		4.00767	0.00055		0.0117814	1.8e-06		0.409479	6.1e-05			0.0029397	6e-07		0.102174	2.1e-05		0.728624	0.513645	0.403906		'' run on 08 December 2019 at 05:31					2937.11	0.676875
		1.92316	0.00016		0.00564733	1.6e-06		0.196107	2.4e-05			0.00293648	8.5e-07		0.101971	1.5e-05		0.750153	0.604235	0.70812		'' run on 08 December 2019 at 06:57					2936.91	0.878966
		4.00484	0.00047		0.0117728	1.9e-06		0.409261	6.4e-05			0.00293963	5.8e-07		0.102191	2e-05		0.787058	0.709085	0.537149		'' run on 08 December 2019 at 11:38					2936.77	0.652253
		1.92071	0.00018		0.00564066	1.6e-06		0.195856	2.8e-05			0.00293676	8.8e-07		0.101971	1.7e-05		0.704729	0.542307	0.641084		'' run on 08 December 2019 at 13:27					2937.2	0.91582
		4.00473	0.00041		0.011772	1.8e-06		0.409221	6.1e-05			0.00293951	5.5e-07		0.102184	1.9e-05		0.703807	0.557946	0.513554		'' run on 08 December 2019 at 18:30					2936.76	0.618751
		1.92184	0.0001		0.00564587	1.6e-06		0.195943	2.1e-05			0.00293775	8.4e-07		0.101956	1.2e-05		0.595963	0.458277	0.269328		'' run on 08 December 2019 at 19:56					2938.4	0.858867
		4.00384	0.00042		0.0117669	1.8e-06		0.409072	6.6e-05			0.00293891	5.5e-07		0.10217	2e-05		0.734474	0.607039	0.499257		'' run on 09 December 2019 at 00:14					2936.38	0.625726
		1.92125	0.00012		0.00564125	1.5e-06		0.195928	2.2e-05			0.00293624	8.2e-07		0.101979	1.3e-05		0.605961	0.594184	0.515153		'' run on 09 December 2019 at 01:40					2936.55	0.842625
		4.00162	0.00066		0.0117638	1.9e-06		0.40885	6.4e-05			0.00293977	6.7e-07		0.102171	2.3e-05		0.842647	0.558178	0.367453		'' run on 09 December 2019 at 06:21					2937.21	0.752759
